# Supplementary material for: A theoretical study of ternary indole–cation–anion complexes
Source: Royal Society of Chemistry journal article supplement (doi:10.1039/c4ob01879f), 2014-01-01
Supplement: c4ob01879f1.pdf [file c4ob01879f1.pdf]

## Theoretical study of ternary indole-cation-anion complexes

Jorge A. Carrazana-Garcia, Enrique M. Cabaleiro-Lago,  
Alba Campo-Cacharrón, Jesus Rodriguez-Otero

### Supporting Information (SI)

**Table SI-1.** LMO-EDA results (in kcal/mol) of the  $E_{\text{int}}$  (M-X) (the **cation-anion** interaction) in the indole-cation-anion complexes studied. The level and other conditions of the calculations are the same of Tables 2 and 4 in the paper.

|             | <b>Elec</b> | <b>Exch</b> | <b>Rep</b> | <b>Pol</b> | <b>Disp</b> |
|-------------|-------------|-------------|------------|------------|-------------|
| <b>INBz</b> | -126,05     | -10,4       | 25,02      | -9,24      | 1,29        |
| <b>INBb</b> | -129,54     | -11,21      | 26,96      | -9,35      | 1,56        |
| <b>INNz</b> | -132,62     | -9,97       | 24,18      | -11,14     | 1,15        |
| <b>INNb</b> | -140,18     | -14,85      | 36,04      | -12,15     | 1,98        |
| <b>INCz</b> | -137,46     | -13,61      | 34,03      | -10,79     | 0,67        |
| <b>INCb</b> | -140,11     | -15,36      | 38,44      | -11,01     | 0,80        |
| <b>INFz</b> | -150,78     | -11,71      | 28,65      | -11,06     | 4,09        |
| <b>INFb</b> | -152,71     | -12,93      | 31,65      | -11,36     | 4,28        |
| <b>IABz</b> | -111,90     | -21,49      | 41,53      | -14,16     | -3,28       |
| <b>IABb</b> | -116,41     | -25,49      | 49,44      | -15,31     | -3,56       |
| <b>IANz</b> | -156,45     | -97,95      | 191,55     | -133,17    | 2,53        |
| <b>IANb</b> | -159,02     | -100,97     | 196,76     | -140,65    | 3,63        |
| <b>IACz</b> | -124,85     | -37,56      | 72,85      | -30,70     | -4,86       |
| <b>IACb</b> | -130,78     | -49,34      | 96,16      | -41,07     | -5,40       |
| <b>IAFz</b> | -168,58     | -98,95      | 189,00     | -155,53    | 13,26       |
| <b>IAFb</b> | -173,75     | -101,71     | 194,22     | -157,74    | 13,97       |
| <b>IGBz</b> | -100,98     | -23,71      | 44,41      | -14,13     | -4,43       |
| <b>IGBb</b> | -104,88     | -27,79      | 51,98      | -15,36     | -5,14       |
| <b>IGNz</b> | -112,36     | -36,82      | 68,27      | -21,91     | -6,43       |
| <b>IGNb</b> | -115,82     | -42,58      | 79,47      | -24,68     | -6,89       |
| <b>IGCz</b> | -115,79     | -37,15      | 67,52      | -20,78     | -6,41       |
| <b>IGCb</b> | -120,23     | -45,79      | 83,94      | -25,13     | -7,26       |
| <b>IGFz</b> | -132,25     | -48,15      | 89,53      | -29,29     | -3,90       |
| <b>IGFb</b> | -138,22     | -57,64      | 107,97     | -34,17     | -4,26       |
| <b>ITBz</b> | -84,04      | -16,87      | 29,10      | -8,42      | -4,53       |
| <b>ITBb</b> | -87,37      | -20,73      | 35,90      | -9,31      | -5,17       |
| <b>ITNz</b> | -86,97      | -23,12      | 39,44      | -10,10     | -7,11       |
| <b>ITNb</b> | -89,14      | -26,92      | 46,12      | -10,93     | -7,62       |
| <b>ITCz</b> | -97,30      | -34,49      | 58,84      | -15,01     | -6,09       |
| <b>ITCb</b> | -101,18     | -41,80      | 71,78      | -16,77     | -6,69       |
| <b>ITFz</b> | -94,14      | -27,35      | 46,60      | -14,30     | -3,48       |
| <b>ITFb</b> | -103,97     | -36,12      | 62,24      | -17,00     | -4,10       |

**Table SI-2.** LMO-EDA results (in kcal/mol) of the  $E_{\text{int}}$  (M-I) (the **cation- $\pi$**  interaction) in the indole-cation-anion complexes studied. The level and other conditions of the calculations are the same of Tables 2 and 4 in the paper.

|             | <b>Elec</b> | <b>Exch</b> | <b>Rep</b> | <b>Pol</b> | <b>Disp</b> |
|-------------|-------------|-------------|------------|------------|-------------|
| <b>INBz</b> | -15,27      | -7,84       | 19,30      | -18,84     | 1,34        |
| <b>INBb</b> | -17,26      | -5,44       | 13,56      | -15,93     | 0,68        |
| <b>INNz</b> | -18,40      | -4,74       | 11,68      | -16,55     | 1,62        |
| <b>INNb</b> | -17,06      | -5,04       | 12,56      | -15,60     | 0,63        |
| <b>INCz</b> | -11,26      | -3,23       | 7,93       | -15,39     | 1,10        |
| <b>INCb</b> | -14,37      | -3,81       | 9,49       | -15,05     | 0,29        |
| <b>INFz</b> | -7,83       | -3,18       | 7,95       | -13,58     | 0,74        |
| <b>INFb</b> | -14,47      | -3,58       | 8,91       | -14,73     | 0,33        |
| <b>IABz</b> | -13,14      | -12,20      | 23,15      | -13,63     | -4,95       |
| <b>IABb</b> | -16,58      | -10,83      | 20,45      | -12,48     | -4,35       |
| <b>IANz</b> | -10,50      | -6,86       | 12,59      | -9,30      | -4,17       |
| <b>IANb</b> | -13,38      | -6,22       | 11,39      | -8,87      | -3,95       |
| <b>IACz</b> | -11,06      | -11,81      | 22,24      | -12,87     | -4,99       |
| <b>IACb</b> | -15,76      | -9,97       | 18,70      | -11,12     | -4,34       |
| <b>IAFz</b> | -7,81       | -7,19       | 13,08      | -8,93      | -4,56       |
| <b>IAFb</b> | -12,94      | -6,24       | 11,37      | -8,46      | -4,05       |
| <b>IGBz</b> | -15,17      | -22,68      | 40,15      | -9,13      | -10,86      |
| <b>IGBb</b> | -16,18      | -18,82      | 33,32      | -8,07      | -9,12       |
| <b>IGNz</b> | -13,35      | -19,97      | 35,23      | -8,73      | -9,95       |
| <b>IGNb</b> | -14,94      | -17,62      | 31,03      | -7,32      | -8,91       |
| <b>IGCz</b> | -13,62      | -23,65      | 41,84      | -9,08      | -11,19      |
| <b>IGCb</b> | -14,87      | -19,18      | 33,56      | -6,91      | -10,02      |
| <b>IGFz</b> | -12,07      | -20,06      | 35,38      | -8,44      | -9,97       |
| <b>IGFb</b> | -14,54      | -17,77      | 31,29      | -6,99      | -8,85       |
| <b>ITBz</b> | -8,33       | -15,34      | 26,45      | -5,19      | -8,39       |
| <b>ITBb</b> | -10,37      | -13,29      | 22,67      | -4,81      | -7,52       |
| <b>ITNz</b> | -9,98       | -17,59      | 30,02      | -5,99      | -9,13       |
| <b>ITNb</b> | -11,61      | -17,28      | 29,20      | -5,84      | -9,17       |
| <b>ITCz</b> | -7,70       | -16,18      | 27,76      | -5,19      | -8,79       |
| <b>ITCb</b> | -10,01      | -12,59      | 21,61      | -4,40      | -7,23       |
| <b>ITFz</b> | -10,65      | -20,47      | 35,11      | -6,14      | -10,17      |
| <b>ITFb</b> | -11,50      | -16,66      | 28,16      | -5,52      | -9,13       |

**Table SI-3.** LMO-EDA results (in kcal/mol) of the  $E_{\text{int}}$  (I-X) (the **indole-anion** interaction) in the indole-cation-anion complexes studied. The level and other conditions of the calculations are the same of Tables 2 and 4 in the paper.

|             | <b>Elec</b> | <b>Exch</b> | <b>Rep</b> | <b>Pol</b> | <b>Disp</b> |
|-------------|-------------|-------------|------------|------------|-------------|
| <b>INBz</b> | -17,86      | -28,27      | 51,28      | -12,02     | -6,00       |
| <b>INBb</b> | 0,42        | -7,17       | 11,62      | -4,98      | -2,60       |
| <b>INNz</b> | -1,48       | -9,83       | 15,78      | -5,17      | -4,95       |
| <b>INNb</b> | 1,69        | -6,03       | 9,41       | -4,66      | -2,58       |
| <b>INCz</b> | -11,56      | -15,82      | 26,13      | -7,73      | -4,67       |
| <b>INCb</b> | -0,07       | -6,36       | 9,76       | -5,28      | -1,88       |
| <b>INFz</b> | -15,08      | -15,95      | 27,17      | -9,90      | -3,56       |
| <b>INFb</b> | 1,05        | -5,07       | 7,79       | -5,56      | -1,56       |
| <b>IABz</b> | -12,88      | -15,01      | 26,32      | -7,98      | -4,54       |
| <b>IABb</b> | 2,56        | -7,40       | 11,81      | -5,04      | -3,28       |
| <b>IANz</b> | -7,40       | -8,98       | 14,96      | -5,39      | -3,89       |
| <b>IANb</b> | 3,22        | -9,11       | 14,28      | -4,71      | -5,00       |
| <b>IACz</b> | -17,46      | -21,29      | 36,15      | -10,32     | -5,21       |
| <b>IACb</b> | 2,32        | -8,38       | 12,72      | -5,60      | -2,80       |
| <b>IAFz</b> | -16,36      | -13,4       | 23,26      | -9,56      | -2,99       |
| <b>IAFb</b> | 3,25        | -6,08       | 9,28       | -5,54      | -2,72       |
| <b>IGBz</b> | -14,61      | -12,72      | 22,61      | -7,54      | -3,32       |
| <b>IGBb</b> | -0,49       | -4,70       | 7,66       | -4,00      | -1,40       |
| <b>IGNz</b> | -13,54      | -13,52      | 23,63      | -7,52      | -4,00       |
| <b>IGNb</b> | 0,24        | -5,72       | 9,04       | -4,44      | -2,32       |
| <b>IGCz</b> | -20,45      | -22,62      | 39,05      | -11,79     | -5,05       |
| <b>IGCb</b> | 1,97        | -10,21      | 15,63      | -6,05      | -3,15       |
| <b>IGFz</b> | -17,74      | -17,33      | 30,14      | -10,68     | -3,41       |
| <b>IGFb</b> | 0,07        | -4,83       | 7,41       | -5,37      | -1,67       |
| <b>ITBz</b> | -14,29      | -12,18      | 21,48      | -7,32      | -3,38       |
| <b>ITBb</b> | 1,39        | -5,81       | 9,37       | -4,26      | -2,24       |
| <b>ITNz</b> | -17,23      | -19,78      | 33,76      | -9,14      | -6,16       |
| <b>ITNb</b> | -0,48       | -10,62      | 16,92      | -5,60      | -3,86       |
| <b>ITCz</b> | -20,15      | -22,78      | 39,19      | -11,78     | -5,21       |
| <b>ITCb</b> | 0,06        | -9,04       | 13,96      | -5,96      | -2,57       |
| <b>ITFz</b> | -25,70      | -28,86      | 51,46      | -17,24     | -4,50       |
| <b>ITFb</b> | 1,49        | -8,83       | 13,76      | -6,44      | -2,68       |

**Table SI-4.** LMO-EDA results (in kcal/mol) of the  $E_{\text{int}}$  (Thr) (the **three-body** interaction) in the indole-cation-anion complexes studied. The level and other conditions of the calculations are the same of Tables 2 and 4 in the paper.

|             | <b>Elec</b> | <b>Exch</b> | <b>Rep</b> | <b>Pol</b> | <b>Disp</b> |
|-------------|-------------|-------------|------------|------------|-------------|
| <b>INBz</b> | 0.00        | 0.00        | 0.31       | 15.01      | 0.22        |
| <b>INBb</b> | 0.01        | 0.00        | 0.12       | 14.89      | 0.02        |
| <b>INNz</b> | 0.01        | 0.00        | 0.27       | 14.90      | 0.08        |
| <b>INNb</b> | -0.01       | 0.00        | 0.11       | 15.71      | -0.03       |
| <b>INCz</b> | 0.00        | 0.00        | 0.46       | 15.67      | 0.25        |
| <b>INCb</b> | 0.01        | 0.00        | 0.20       | 15.52      | 0.03        |
| <b>INFz</b> | 0.00        | -0.01       | 0.35       | 16.40      | 0.11        |
| <b>INFb</b> | 0.00        | 0.00        | 0.11       | 16.42      | -0.17       |
| <b>IABz</b> | 0.01        | 0.00        | -0.16      | 11.67      | 0.54        |
| <b>IABb</b> | 0.00        | 0.00        | -0.25      | 11.02      | 0.29        |
| <b>IANz</b> | 0.00        | 0.01        | 0.74       | 17.19      | 0.56        |
| <b>IANb</b> | 0.00        | 0.00        | -0.32      | 14.51      | 0.46        |
| <b>IACz</b> | 0.00        | 0.00        | -0.57      | 15.52      | 0.79        |
| <b>IACb</b> | 0.01        | 0.00        | -0.83      | 13.85      | 0.22        |
| <b>IAFz</b> | -0.01       | -0.01       | 0.94       | 19.40      | 0.71        |
| <b>IAFb</b> | 0.00        | 0.00        | 0.00       | 15.62      | 0.02        |
| <b>IGBz</b> | 0.00        | 0.00        | -0.26      | 7.51       | 0.46        |
| <b>IGBb</b> | 0.00        | 0.00        | -0.34      | 7.21       | 0.14        |
| <b>IGNz</b> | 0.01        | 0.00        | -0.52      | 9.41       | 0.60        |
| <b>IGNb</b> | 0.00        | -0.01       | -0.63      | 8.09       | 0.24        |
| <b>IGCz</b> | 0.00        | 0.00        | -1.01      | 10.85      | 0.99        |
| <b>IGCb</b> | 0.00        | 0.01        | -1.28      | 8.30       | 0.48        |
| <b>IGFz</b> | 0.00        | 0.01        | -0.85      | 12.08      | 0.48        |
| <b>IGFb</b> | -0.01       | 0.00        | -0.81      | 10.09      | -0.07       |
| <b>ITBz</b> | 0.00        | 0.00        | -0.36      | 6.49       | 0.45        |
| <b>ITBb</b> | -0.01       | 0.01        | -0.47      | 5.39       | 0.21        |
| <b>ITNz</b> | 0.00        | -0.01       | -0.33      | 7.06       | 0.57        |
| <b>ITNb</b> | 0.00        | 0.00        | -0.37      | 5.45       | 0.24        |
| <b>ITCz</b> | 0.00        | 0.00        | -1.24      | 9.18       | 0.95        |
| <b>ITCb</b> | 0.00        | 0.00        | -1.12      | 6.79       | 0.42        |
| <b>ITFz</b> | 0.01        | 0.00        | -0.74      | 8.16       | 0.60        |
| <b>ITFb</b> | 0.00        | 0.01        | -0.90      | 7.17       | 0.18        |

**Table SI-5.** Comparison of the results of the calculations at the M06-2X/6-31+G\* level in the gas phase with the results at the same level in water (PCM) for the IACz complex as the anion is separated from the cation-indole fragment. The starting geometries correspond to the structure of the IACz complex optimized in gas phase and in water, respectively.

| r IM-X | phase       | Total   | M-X     | I-X    | Thr   |
|--------|-------------|---------|---------|--------|-------|
| 2.89   | Gas         | -150.34 | -130.23 | -16.01 | 15.48 |
| 3.13   | Water (PCM) | -16.50  | -8.99   | -2.17  | -2.24 |
| 3.30   | Gas         | -142.91 | -118.63 | -16.81 | 12.13 |
|        | Water (PCM) | -15.98  | -8.29   | -2.48  | -2.06 |
| 3.70   | Gas         | -130.68 | -104.28 | -16.09 | 9.30  |
|        | Water (PCM) | -12.44  | -5.09   | -2.45  | -1.67 |
| 4.00   | Gas         | -121.48 | -94.53  | -14.95 | 7.62  |
|        | Water (PCM) | -9.57   | -2.94   | -1.94  | -1.41 |
| 4.50   | Gas         | -108.02 | -81.35  | -12.71 | 5.67  |
|        | Water (PCM) | -6.43   | -1.21   | -1.00  | -0.90 |
| 4.70   | Gas         | -103.44 | -77.11  | -11.84 | 5.13  |
|        | Water (PCM) | -5.75   | -0.87   | -0.73  | -0.82 |
| 4.80   | Gas         | -101.31 | -75.16  | -11.41 | 4.88  |
|        | Water (PCM) | -5.51   | -0.76   | -0.62  | -0.81 |
| 4.90   | Gas         | -99.27  | -73.32  | -11.00 | 4.66  |
|        | Water (PCM) | -5.32   | -0.68   | -0.52  | -0.80 |
| 5.00   | Gas         | -97.32  | -71.57  | -10.59 | 4.46  |
|        | Water (PCM) | -5.17   | -0.61   | -0.44  | -0.79 |
| 5.50   | Gas         | -88.77  | -64.01  | -8.76  | 3.61  |
|        | Water (PCM) | -4.72   | -0.39   | -0.23  | -0.75 |
| 6.00   | Gas         | -81.84  | -58.02  | -7.24  | 3.03  |
|        | Water (PCM) | -4.44   | -0.27   | -0.10  | -0.71 |
| 7.00   | Gas         | -71.47  | -49.29  | -5.05  | 2.48  |
|        | Water (PCM) | -4.12   | -0.11   | 0.07   | -0.71 |
| 9.00   | Gas         | -58.73  | -39.14  | -2.74  | 2.76  |
|        | Water (PCM) | -3.89   | 0.03    | 0.18   | -0.73 |

**Fig. SI-1.** Structures of the monohydrates included in the study of the influence of the solvent using a combination of PCM=water and the addition of one H<sub>2</sub>O molecule. All the structures were optimized at the m062x/6-31+g\* level of calculation in with PCM=water and are minima in their respective PES.

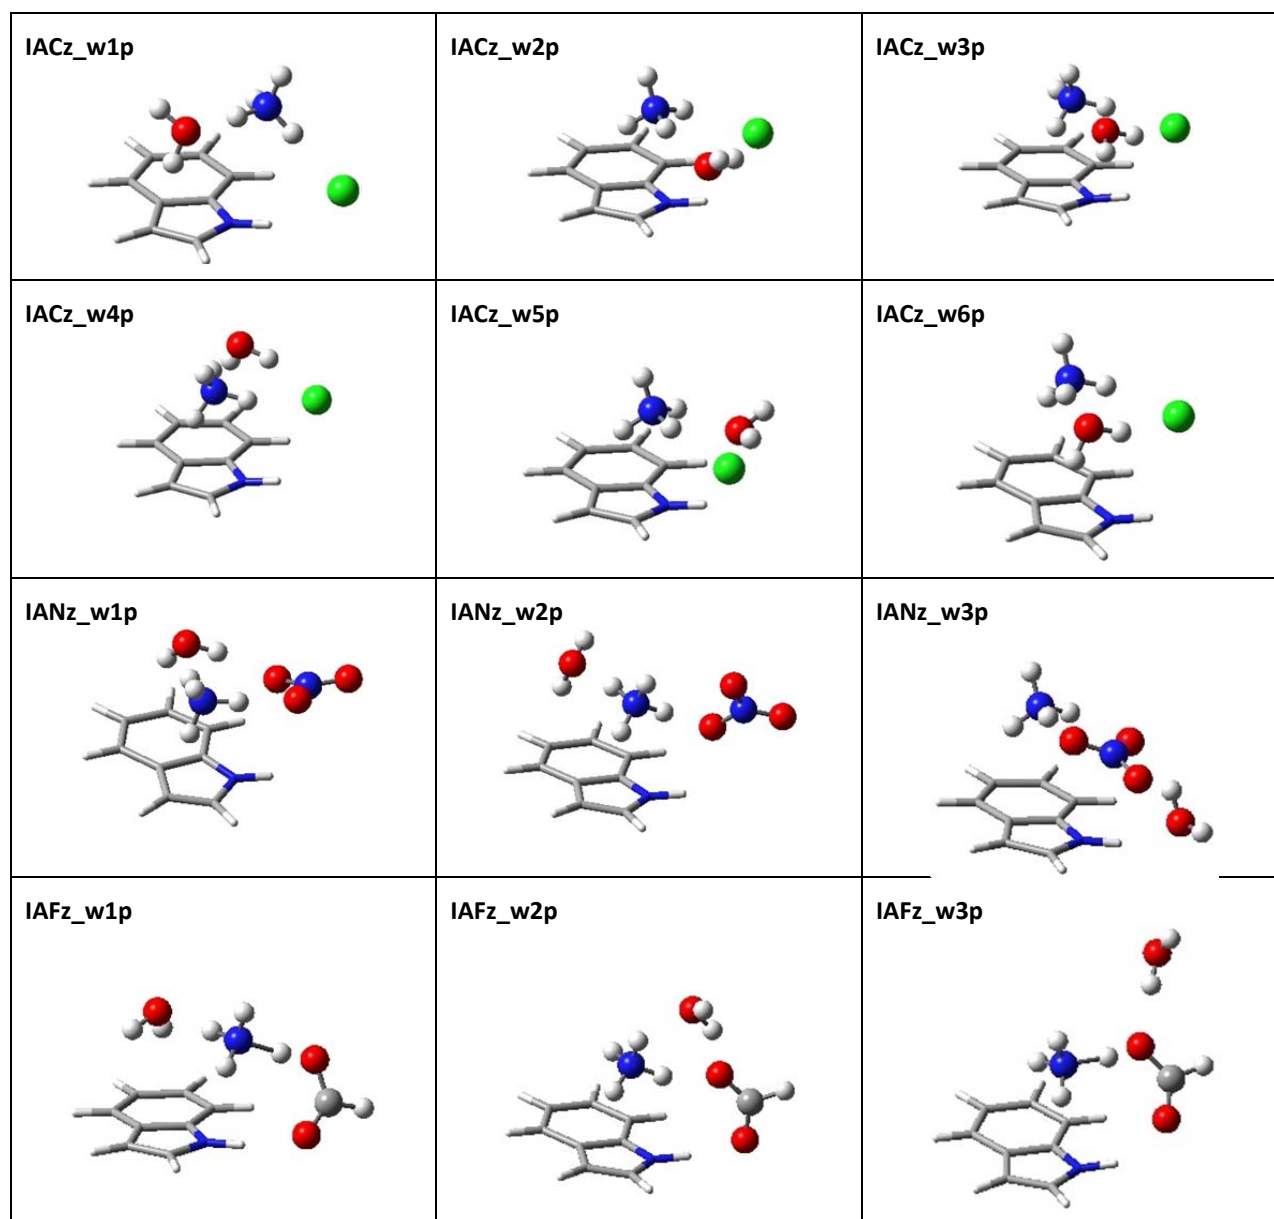

## Optimized structures of the indole-cation-anion complexes studied.

Level of calculation: M062X/6-31+G(d)

The labels use the following acronyms:

$\pi$ -system: I = indole;

Cation: A = NH<sub>4</sub><sup>+</sup>, N = Na<sup>+</sup>, G = C(NH<sub>2</sub>)<sub>3</sub><sup>+</sup>, T = N(CH<sub>3</sub>)<sub>4</sub><sup>+</sup>;

Anion: B = BF<sub>4</sub><sup>-</sup>, C = Cl<sup>-</sup>, F = HCOO<sup>-</sup>, N = NO<sub>3</sub><sup>-</sup>;

Orientation: z = anion by the side of the N-H group of indole,  
b = anion by the opposite side of the N-H group of indole.

| IABz |           |           | IABb      |   |           |           |           |
|------|-----------|-----------|-----------|---|-----------|-----------|-----------|
| C    | 0.468559  | 2.149690  | -0.532901 | C | -1.536037 | 2.495032  | -0.036388 |
| C    | 1.591261  | 2.131166  | 0.258625  | C | -0.654366 | 1.745959  | -0.762181 |
| C    | 2.176279  | 0.824125  | 0.117460  | C | -1.124846 | 0.389697  | -0.709947 |
| C    | 3.269499  | 0.165648  | 0.711322  | C | -0.647485 | -0.825405 | -1.235543 |
| C    | 3.485996  | -1.171020 | 0.417608  | C | -1.330364 | -1.995985 | -0.939737 |
| C    | 2.636674  | -1.872407 | -0.466874 | C | -2.485922 | -1.983560 | -0.126034 |
| C    | 1.561342  | -1.249530 | -1.080864 | C | -2.988195 | -0.796891 | 0.397564  |
| C    | 1.350473  | 0.104149  | -0.784734 | C | -2.301320 | 0.385180  | 0.087003  |
| N    | 0.334548  | 0.943991  | -1.175501 | N | -2.526487 | 1.681722  | 0.485126  |
| H    | -0.265205 | 2.928262  | -0.686762 | H | -1.541551 | 3.556258  | 0.169312  |
| H    | 1.966832  | 2.955647  | 0.848834  | H | 0.245434  | 2.091110  | -1.250789 |
| H    | 3.927279  | 0.697688  | 1.393666  | H | 0.260834  | -0.836034 | -1.829715 |
| H    | 4.323864  | -1.691706 | 0.871468  | H | -0.967602 | -2.941401 | -1.331315 |
| H    | 2.832135  | -2.920602 | -0.671869 | H | -2.999599 | -2.916849 | 0.086052  |
| H    | 0.896695  | -1.785781 | -1.751930 | H | -3.883527 | -0.788866 | 1.013434  |
| H    | -0.519505 | 0.633671  | -1.624816 | H | -3.324702 | 2.003179  | 1.011657  |
| N    | -0.345815 | -0.219009 | 1.606502  | N | 0.165365  | -0.886702 | 1.756087  |
| H    | -1.240799 | -0.311630 | 2.109864  | H | 0.908099  | -1.299760 | 1.133452  |
| H    | -0.467311 | -0.763030 | 0.731775  | H | 0.362357  | -1.100336 | 2.734120  |
| H    | -0.202902 | 0.765719  | 1.331322  | H | -0.770992 | -1.209393 | 1.480385  |
| H    | 0.459090  | -0.557532 | 2.136436  | H | 0.273292  | 0.125048  | 1.588335  |
| B    | -2.761485 | -0.277040 | -0.007055 | B | 2.636919  | 0.059762  | -0.039030 |
| F    | -2.269056 | 1.045036  | 0.114130  | F | 3.994356  | 0.133193  | 0.106750  |
| F    | -1.688095 | -1.035118 | -0.604019 | F | 2.198222  | -1.312472 | 0.177598  |
| F    | -3.892568 | -0.351894 | -0.759892 | F | 2.190005  | 0.460195  | -1.289449 |
| F    | -2.935212 | -0.783726 | 1.304495  | F | 1.972131  | 0.826743  | 0.966580  |

| IACz |           |           | IACb      |    |           |           |           |
|------|-----------|-----------|-----------|----|-----------|-----------|-----------|
| C    | -0.292414 | 2.192279  | -0.474871 | C  | -0.734829 | 2.457887  | -0.208827 |
| C    | 0.931991  | 2.163730  | 0.150463  | C  | 0.077070  | 1.617958  | -0.916924 |
| C    | 1.434829  | 0.823950  | 0.009703  | C  | -0.454916 | 0.293180  | -0.756185 |
| C    | 2.575959  | 0.145078  | 0.478603  | C  | -0.037783 | -0.978314 | -1.189624 |
| C    | 2.683487  | -1.216579 | 0.251286  | C  | -0.749158 | -2.091739 | -0.770865 |
| C    | 1.676223  | -1.925175 | -0.444270 | C  | -1.878894 | -1.965255 | 0.069543  |
| C    | 0.552473  | -1.282803 | -0.938541 | C  | -2.318472 | -0.723552 | 0.505330  |
| C    | 0.453940  | 0.097542  | -0.713087 | C  | -1.594805 | 0.398497  | 0.079971  |
| N    | -0.569658 | 0.962587  | -1.016101 | N  | -1.737791 | 1.729211  | 0.407426  |
| H    | -0.995642 | 3.005889  | -0.588467 | H  | -0.682313 | 3.529554  | -0.076376 |
| H    | 1.425617  | 3.001305  | 0.623758  | H  | 0.971905  | 1.887658  | -1.459283 |
| H    | 3.351237  | 0.679527  | 1.021013  | H  | 0.853772  | -1.076946 | -1.801338 |
| H    | 3.555503  | -1.754771 | 0.610982  | H  | -0.433425 | -3.080751 | -1.088561 |
| H    | 1.788858  | -2.994466 | -0.596864 | H  | -2.416627 | -2.857549 | 0.376684  |
| H    | -0.236340 | -1.818970 | -1.457857 | H  | -3.185409 | -0.628914 | 1.153705  |
| H    | -1.500802 | 0.645673  | -1.284486 | H  | -2.510805 | 2.125068  | 0.920851  |
| N    | -0.971004 | -0.175261 | 1.825324  | N  | 1.025085  | -0.415447 | 1.763883  |
| H    | -1.338152 | -0.198791 | 2.776930  | H  | 0.384203  | -1.132146 | 1.410780  |
| H    | -0.552939 | 0.743016  | 1.627152  | H  | 1.946751  | -0.282183 | 0.981230  |
| H    | -0.247991 | -0.889651 | 1.705813  | H  | 1.377518  | -0.678603 | 2.683380  |
| H    | -1.820722 | -0.378686 | 1.079423  | H  | 0.519590  | 0.469705  | 1.821413  |
| Cl   | -3.102525 | -0.678794 | -0.064569 | Cl | 3.194971  | -0.089601 | -0.058598 |

**IAFz**

|   |           |           |           |
|---|-----------|-----------|-----------|
| C | 0.537027  | 2.377542  | -0.246506 |
| C | 1.738660  | 1.994836  | 0.295243  |
| C | 1.868848  | 0.584466  | 0.055562  |
| C | 2.823269  | -0.391904 | 0.396523  |
| C | 2.582263  | -1.712732 | 0.057472  |
| C | 1.404869  | -2.089267 | -0.628430 |
| C | 0.452953  | -1.150974 | -0.991195 |
| C | 0.702966  | 0.183872  | -0.645329 |
| N | -0.080267 | 1.296518  | -0.827141 |
| H | 0.071205  | 3.353112  | -0.278802 |
| H | 2.448786  | 2.642334  | 0.790494  |
| H | 3.729288  | -0.113386 | 0.928121  |
| H | 3.308973  | -2.476394 | 0.318875  |
| H | 1.246390  | -3.134466 | -0.877456 |
| H | -0.456790 | -1.429006 | -1.515506 |
| H | -1.051987 | 1.244517  | -1.122191 |
| N | -0.794800 | -0.085918 | 1.971697  |
| H | -0.393308 | 0.810727  | 1.691724  |
| H | -0.096267 | -0.792592 | 1.739734  |
| H | -0.894933 | -0.073380 | 2.985082  |
| H | -2.211351 | -0.452800 | 1.222221  |
| C | -3.441981 | -0.382597 | -0.310143 |
| H | -4.430385 | -0.752906 | -0.618270 |
| O | -2.759864 | 0.308818  | -1.043683 |
| O | -3.134810 | -0.781243 | 0.896795  |

**IAFb**

|   |           |           |           |
|---|-----------|-----------|-----------|
| C | 1.640930  | -2.298746 | 0.006044  |
| C | 0.604413  | -1.769316 | -0.711004 |
| C | 0.767647  | -0.342316 | -0.682224 |
| C | 0.019961  | 0.733728  | -1.191284 |
| C | 0.434278  | 2.026898  | -0.919258 |
| C | 1.589713  | 2.274827  | -0.146106 |
| C | 2.352139  | 1.234604  | 0.364083  |
| C | 1.927435  | -0.070666 | 0.085792  |
| N | 2.441706  | -1.282240 | 0.488511  |
| H | 1.882060  | -3.330293 | 0.222362  |
| H | -0.201654 | -2.313037 | -1.182170 |
| H | -0.879281 | 0.540929  | -1.768221 |
| H | -0.140267 | 2.867331  | -1.297003 |
| H | 1.888272  | 3.300241  | 0.051621  |
| H | 3.240822  | 1.428053  | 0.958912  |
| H | 3.277531  | -1.410081 | 1.037906  |
| N | -0.988223 | 0.279027  | 1.872204  |
| H | -2.415811 | 0.591063  | 1.090930  |
| H | -0.989747 | 0.179924  | 2.884442  |
| H | -0.257092 | 0.943712  | 1.617741  |
| H | -0.725979 | -0.617553 | 1.459051  |
| C | -3.355959 | -0.297715 | -0.325772 |
| H | -4.285356 | -0.244095 | -0.913085 |
| O | -3.283714 | 0.680478  | 0.551351  |
| O | -2.522688 | -1.163163 | -0.497491 |

**IANz**

|   |           |           |           |
|---|-----------|-----------|-----------|
| C | 0.586147  | 2.258454  | -0.613976 |
| C | 1.771155  | 2.114680  | 0.062505  |
| C | 2.113722  | 0.719567  | 0.007679  |
| C | 3.157913  | -0.060019 | 0.538753  |
| C | 3.133374  | -1.431198 | 0.349392  |
| C | 2.085647  | -2.051817 | -0.367764 |
| C | 1.048931  | -1.312449 | -0.913977 |
| C | 1.082884  | 0.075257  | -0.721603 |
| N | 0.177926  | 1.038483  | -1.097400 |
| H | -0.000639 | 3.146321  | -0.805411 |
| H | 2.338592  | 2.909723  | 0.525934  |
| H | 3.964828  | 0.408786  | 1.095565  |
| H | 3.931016  | -2.045120 | 0.756950  |
| H | 2.095123  | -3.130259 | -0.495093 |
| H | 0.233094  | -1.782898 | -1.454598 |
| H | -0.725419 | 0.831388  | -1.503729 |
| N | -0.525765 | 0.008626  | 1.887058  |
| H | -0.448769 | -0.080739 | 2.898834  |
| H | -0.040541 | -0.783297 | 1.462062  |
| H | -0.005555 | 0.844297  | 1.608998  |
| H | -1.925833 | 0.047914  | 1.411874  |
| N | -3.136261 | -0.327903 | -0.087672 |
| O | -4.260100 | -0.349421 | -0.515714 |
| O | -2.979369 | 0.103917  | 1.156909  |
| O | -2.123760 | -0.663925 | -0.698862 |

**IANb**

|   |           |           |           |
|---|-----------|-----------|-----------|
| C | 2.048201  | -2.219789 | -0.095135 |
| C | 0.914833  | -1.797210 | -0.732726 |
| C | 0.939449  | -0.360920 | -0.715950 |
| C | 0.061124  | 0.636928  | -1.174430 |
| C | 0.366910  | 1.965393  | -0.930044 |
| C | 1.544295  | 2.327249  | -0.239692 |
| C | 2.439489  | 1.367438  | 0.210776  |
| C | 2.121885  | 0.025776  | -0.036171 |
| N | 2.778366  | -1.127766 | 0.329038  |
| H | 2.405326  | -3.221857 | 0.097787  |
| H | 0.140428  | -2.424700 | -1.150191 |
| H | -0.843338 | 0.366674  | -1.713698 |
| H | -0.311818 | 2.742346  | -1.267887 |
| H | 1.757210  | 3.377622  | -0.064062 |
| H | 3.348224  | 1.647104  | 0.737051  |
| H | 3.669562  | -1.170778 | 0.799181  |
| N | -0.435625 | 0.282319  | 2.063566  |
| H | 0.285326  | 0.948399  | 1.781957  |
| H | -0.150356 | -0.636012 | 1.720496  |
| H | -0.472245 | 0.253815  | 3.079869  |
| H | -1.751673 | 0.552177  | 1.326291  |
| N | -2.820398 | -0.314207 | -0.028969 |
| O | -2.626936 | 0.747405  | 0.756514  |
| O | -2.113199 | -1.292468 | 0.160537  |
| O | -3.678635 | -0.203235 | -0.868554 |



**IGBz**

|   |           |           |           |
|---|-----------|-----------|-----------|
| C | -0.496603 | 2.376583  | -0.646325 |
| C | -1.774122 | 2.107829  | -1.083174 |
| C | -2.292973 | 1.080461  | -0.222627 |
| C | -3.510535 | 0.376518  | -0.141454 |
| C | -3.647673 | -0.619756 | 0.813360  |
| C | -2.592856 | -0.931337 | 1.703709  |
| C | -1.388732 | -0.244640 | 1.662368  |
| C | -1.258614 | 0.766536  | 0.700352  |
| N | -0.196553 | 1.588369  | 0.429964  |
| H | 0.237546  | 3.075326  | -1.023797 |
| H | -2.292728 | 2.614289  | -1.885585 |
| H | -4.331774 | 0.615015  | -0.812881 |
| H | -4.586527 | -1.160529 | 0.893492  |
| H | -2.739274 | -1.707530 | 2.449809  |
| H | -0.571211 | -0.470694 | 2.340880  |
| H | 0.737274  | 1.453578  | 0.807609  |
| C | -0.075899 | -1.567076 | -1.104592 |
| N | -1.379564 | -1.875580 | -1.306236 |
| N | 0.672112  | -0.356001 | -0.356063 |
| N | 0.462311  | -0.523433 | -1.728667 |
| H | 1.435140  | -0.281182 | -1.538630 |
| H | -0.139790 | 0.256887  | -1.979424 |
| H | -1.936469 | -1.153238 | -1.749432 |
| H | -1.865579 | -2.273366 | -0.508416 |
| H | 0.294911  | -3.224271 | 0.014203  |
| H | 1.626603  | -2.083156 | -0.122412 |
| B | 2.958207  | 0.179014  | 0.360750  |
| F | 2.501855  | 1.206529  | -0.499160 |
| F | 1.934487  | -0.048868 | 1.317073  |
| F | 4.152790  | 0.475157  | 0.944502  |
| F | 3.039838  | -1.010307 | -0.434843 |

**IGBb**

|   |           |           |           |
|---|-----------|-----------|-----------|
| C | -1.779489 | 2.587641  | 0.367563  |
| C | -0.870893 | 1.896762  | -0.385256 |
| C | -1.482479 | 0.638722  | -0.720300 |
| C | -1.053714 | -0.485561 | -1.448059 |
| C | -1.909916 | -1.571719 | -1.560330 |
| C | -3.190509 | -1.560505 | -0.962270 |
| C | -3.639955 | -0.463261 | -0.240365 |
| C | -2.772531 | 0.631239  | -0.131281 |
| N | -2.922136 | 1.824915  | 0.539180  |
| H | -1.716032 | 3.576552  | 0.800583  |
| H | 0.122436  | 2.216261  | -0.669506 |
| H | -0.061836 | -0.493547 | -1.890653 |
| H | -1.600951 | -2.442793 | -2.131362 |
| H | -3.842716 | -2.421218 | -1.081034 |
| H | -4.628591 | -0.453120 | 0.210842  |
| H | -3.772058 | 2.146058  | 0.978269  |
| C | 0.255383  | -1.088224 | 1.434333  |
| N | 1.048513  | -1.963231 | 0.837278  |
| N | -1.022567 | -1.450730 | 1.721497  |
| N | 0.715890  | 0.090188  | 1.843031  |
| H | 0.055948  | 0.858614  | 1.880101  |
| H | 1.676117  | 0.361585  | 1.593264  |
| H | 1.943675  | -1.681332 | 0.413397  |
| H | 0.713501  | -2.900366 | 0.666567  |
| H | -1.514373 | -1.953554 | 0.986303  |
| H | -1.598355 | -0.734089 | 2.145494  |
| B | 3.155761  | 0.290505  | -0.439933 |
| F | 4.070238  | 0.904251  | -1.245613 |
| F | 3.210023  | 0.790912  | 0.894758  |
| F | 3.377417  | -1.115424 | -0.359204 |
| F | 1.828006  | 0.470244  | -0.891465 |

**IGCz**

|    |           |           |           |
|----|-----------|-----------|-----------|
| C  | -0.012091 | 2.482559  | 0.449863  |
| C  | 1.218166  | 2.141560  | 0.964298  |
| C  | 1.674089  | 1.005921  | 0.211403  |
| C  | 2.828473  | 0.198627  | 0.234019  |
| C  | 2.917437  | -0.870839 | -0.643832 |
| C  | 1.878131  | -1.152915 | -1.561964 |
| C  | 0.739008  | -0.364692 | -1.622478 |
| C  | 0.655113  | 0.717493  | -0.735965 |
| N  | -0.341579 | 1.646073  | -0.582541 |
| H  | -0.687723 | 3.276196  | 0.739853  |
| H  | 1.748881  | 2.664877  | 1.747835  |
| H  | 3.639943  | 0.415614  | 0.924439  |
| H  | 3.808932  | -1.491813 | -0.645130 |
| H  | 1.988391  | -1.986659 | -2.250199 |
| H  | -0.063396 | -0.563861 | -2.327936 |
| H  | -1.295473 | 1.508595  | -0.936511 |
| C  | -0.722237 | -1.388016 | 1.090705  |
| N  | 0.483448  | -1.874699 | 1.471843  |
| N  | -1.480034 | -2.070608 | 0.243131  |
| N  | -1.202355 | -0.273939 | 1.644045  |
| H  | -2.047324 | 0.105818  | 1.190102  |
| H  | -0.534162 | 0.423128  | 1.962274  |
| H  | 1.075986  | -1.231549 | 1.984133  |
| H  | 1.003820  | -2.372107 | 0.756668  |
| H  | -1.135859 | -2.926264 | -0.167751 |
| H  | -2.244164 | -1.549816 | -0.225901 |
| Cl | -3.207691 | 0.301287  | -0.735500 |

**IGCb**

|    |           |           |           |
|----|-----------|-----------|-----------|
| C  | 0.711683  | -1.788079 | -1.830948 |
| C  | 0.007043  | -0.636087 | -2.011032 |
| C  | 0.602121  | 0.356103  | -1.154809 |
| C  | 0.323522  | 1.710149  | -0.902406 |
| C  | 1.112795  | 2.394071  | 0.008954  |
| C  | 2.175695  | 1.751580  | 0.682740  |
| C  | 2.470074  | 0.413659  | 0.453332  |
| C  | 1.671588  | -0.269225 | -0.472756 |
| N  | 1.694162  | -1.596924 | -0.862203 |
| H  | 0.591385  | -2.758458 | -2.293282 |
| H  | -0.864196 | -0.496729 | -2.635793 |
| H  | -0.519891 | 2.187679  | -1.391306 |
| H  | 0.913172  | 3.441926  | 0.213163  |
| H  | 2.786689  | 2.319702  | 1.379105  |
| H  | 3.299280  | -0.075630 | 0.960042  |
| H  | 2.498879  | -2.199144 | -0.759378 |
| C  | -0.727590 | -0.826784 | 1.573319  |
| N  | -0.990989 | 0.460211  | 1.790774  |
| N  | 0.303001  | -1.436267 | 2.228023  |
| N  | -1.528238 | -1.534298 | 0.799470  |
| H  | -1.371053 | -2.520280 | 0.653450  |
| H  | -2.193410 | -1.000527 | 0.191017  |
| H  | -1.714581 | 0.865906  | 1.165962  |
| H  | -0.217371 | 1.068951  | 2.031699  |
| H  | 0.975289  | -0.808671 | 2.652249  |
| H  | 0.747118  | -2.187547 | 1.713281  |
| Cl | -3.021085 | 0.722438  | -0.567707 |

**IGFz**

|   |           |           |           |
|---|-----------|-----------|-----------|
| C | 0.863533  | 2.554182  | 0.467180  |
| C | 2.028010  | 1.936382  | 0.855471  |
| C | 2.125103  | 0.726689  | 0.086007  |
| C | 3.056909  | -0.327231 | 0.008255  |
| C | 2.797158  | -1.391767 | -0.841647 |
| C | 1.622841  | -1.430190 | -1.627646 |
| C | 0.697642  | -0.398626 | -1.588752 |
| C | 0.969804  | 0.682133  | -0.740194 |
| N | 0.239481  | 1.819665  | -0.508144 |
| H | 0.427755  | 3.483665  | 0.808169  |
| H | 2.743689  | 2.317159  | 1.570989  |
| H | 3.966928  | -0.303351 | 0.602635  |
| H | 3.513867  | -2.204703 | -0.918233 |
| H | 1.451201  | -2.276185 | -2.287620 |
| H | -0.207759 | -0.419676 | -2.189244 |
| H | -0.747646 | 1.914869  | -0.760019 |
| C | -0.718230 | -1.221842 | 1.217811  |
| N | 0.441040  | -1.824812 | 1.597823  |
| N | -1.644426 | -1.892196 | 0.553341  |
| N | -0.961250 | 0.030590  | 1.600099  |
| H | -1.647370 | 0.560171  | 1.017023  |
| H | -0.184139 | 0.570409  | 1.966342  |
| H | 1.242593  | -1.206974 | 1.683835  |
| H | 0.680416  | -2.676500 | 1.106407  |
| H | -1.427674 | -2.808427 | 0.188510  |
| H | -2.506340 | -1.393140 | 0.181953  |
| C | -3.463955 | 0.630752  | -0.756249 |
| O | -2.484217 | 1.295981  | -0.312005 |
| O | -3.706658 | -0.574332 | -0.531251 |
| H | -4.175330 | 1.173868  | -1.407951 |

**IGFb**

|   |           |           |           |
|---|-----------|-----------|-----------|
| C | -1.773487 | 2.466739  | 0.440706  |
| C | -0.726537 | 1.998627  | -0.301884 |
| C | -1.052585 | 0.646509  | -0.665754 |
| C | -0.385478 | -0.347059 | -1.402404 |
| C | -0.995138 | -1.582166 | -1.564934 |
| C | -2.260835 | -1.852230 | -1.000865 |
| C | -2.939906 | -0.894102 | -0.260867 |
| C | -2.320733 | 0.353394  | -0.102971 |
| N | -2.732274 | 1.477743  | 0.578785  |
| H | -1.923484 | 3.434737  | 0.898713  |
| H | 0.192789  | 2.516951  | -0.542098 |
| H | 0.598628  | -0.143182 | -1.817777 |
| H | -0.496319 | -2.355162 | -2.143425 |
| H | -2.719386 | -2.824598 | -1.158366 |
| H | -3.918521 | -1.100165 | 0.164950  |
| H | -3.636049 | 1.602236  | 1.009367  |
| C | 0.971568  | -1.034705 | 1.310652  |
| N | 1.928905  | -1.676646 | 0.661841  |
| N | -0.134558 | -1.701218 | 1.757250  |
| N | 1.131546  | 0.250873  | 1.608471  |
| H | 0.335239  | 0.741679  | 1.994100  |
| H | 1.723896  | 0.814201  | 0.932188  |
| H | 2.718375  | -1.116597 | 0.200113  |
| H | 1.746782  | -2.609309 | 0.319715  |
| H | -0.318355 | -2.590377 | 1.309291  |
| H | -0.977589 | -1.139774 | 1.817426  |
| C | 3.431621  | 0.953707  | -0.813063 |
| O | 2.440071  | 1.560088  | -0.329084 |
| O | 3.752290  | -0.244586 | -0.617651 |
| H | 4.088827  | 1.537794  | -1.486444 |

**IGNz**

|   |           |           |           |
|---|-----------|-----------|-----------|
| C | -0.883168 | 2.511207  | -0.728623 |
| C | -2.122301 | 1.983243  | -1.002931 |
| C | -2.307388 | 0.882474  | -0.098102 |
| C | -3.343103 | -0.043911 | 0.136845  |
| C | -3.159736 | -1.025953 | 1.099052  |
| C | -1.959040 | -1.107473 | 1.841086  |
| C | -0.928228 | -0.201669 | 1.644510  |
| C | -1.122906 | 0.798238  | 0.682572  |
| N | -0.291265 | 1.816018  | 0.293526  |
| H | -0.372374 | 3.349466  | -1.182799 |
| H | -2.830346 | 2.362869  | -1.726564 |
| H | -4.274506 | 0.017702  | -0.420601 |
| H | -3.956311 | -1.737204 | 1.298681  |
| H | -1.850357 | -1.883286 | 2.593951  |
| H | -0.004059 | -0.252654 | 2.213546  |
| H | 0.696762  | 1.867120  | 0.541025  |
| C | 0.197001  | -1.465965 | -1.165926 |
| N | -1.031088 | -2.021491 | -1.314833 |
| N | 1.151163  | -2.102916 | -0.506447 |
| N | 0.477870  | -0.312352 | -1.771100 |
| H | 1.281241  | 0.199443  | -1.375845 |
| H | -0.294425 | 0.257681  | -2.101433 |
| H | -1.799259 | -1.367117 | -1.430955 |
| H | -1.268733 | -2.765249 | -0.671076 |
| H | 0.937144  | -2.947930 | 0.002329  |
| H | 2.088306  | -1.663589 | -0.361948 |
| N | 3.353340  | 0.295219  | 0.375933  |
| O | 4.156184  | 0.911796  | 1.048623  |
| O | 2.256933  | 0.837227  | 0.014921  |
| O | 3.561881  | -0.891491 | 0.015360  |

**IGNb**

|   |           |           |           |
|---|-----------|-----------|-----------|
| C | 1.691487  | 2.534086  | -0.718745 |
| C | 0.700553  | 2.036252  | 0.079132  |
| C | 1.189243  | 0.796049  | 0.617472  |
| C | 0.641413  | -0.168579 | 1.480354  |
| C | 1.404307  | -1.278735 | 1.811981  |
| C | 2.706992  | -1.451744 | 1.295271  |
| C | 3.270595  | -0.521337 | 0.432421  |
| C | 2.495343  | 0.598859  | 0.100855  |
| N | 2.769858  | 1.665312  | -0.727691 |
| H | 1.725813  | 3.446912  | -1.297373 |
| H | -0.275407 | 2.468276  | 0.257048  |
| H | -0.366142 | -0.033564 | 1.864955  |
| H | 1.002710  | -2.021959 | 2.495503  |
| H | 3.287303  | -2.322036 | 1.589064  |
| H | 4.277882  | -0.649880 | 0.044852  |
| H | 3.662983  | 1.856585  | -1.156576 |
| C | -0.411387 | -1.378615 | -1.254142 |
| N | 0.792805  | -1.964729 | -1.487671 |
| N | -0.677694 | -0.182360 | -1.774640 |
| N | -1.363015 | -2.018842 | -0.595960 |
| H | -2.272953 | -1.528720 | -0.404358 |
| H | -1.135236 | -2.842221 | -0.058304 |
| H | 1.000000  | -2.791925 | -0.942739 |
| H | 1.585851  | -1.332410 | -1.526542 |
| H | 0.085709  | 0.341793  | -2.181579 |
| H | -1.378447 | 0.372112  | -1.244494 |
| N | -3.371675 | 0.512651  | 0.384229  |
| O | -2.213653 | 0.984477  | 0.163029  |
| O | -3.635618 | -0.643236 | -0.054892 |
| O | -4.198642 | 1.153183  | 1.004996  |

| <b>INBz</b> |           |           |           |
|-------------|-----------|-----------|-----------|
| C           | -0.288061 | 1.999788  | 0.749408  |
| C           | -1.430781 | 2.119667  | -0.005899 |
| C           | -2.048281 | 0.817351  | -0.035331 |
| C           | -3.206331 | 0.285451  | -0.640509 |
| C           | -3.475063 | -1.062760 | -0.493335 |
| C           | -2.611638 | -1.907792 | 0.241854  |
| C           | -1.471872 | -1.418360 | 0.853126  |
| C           | -1.212156 | -0.045939 | 0.720359  |
| N           | -0.152922 | 0.703871  | 1.183994  |
| H           | 0.462838  | 2.735593  | 1.002394  |
| H           | -1.808199 | 3.031887  | -0.447012 |
| H           | -3.872946 | 0.926987  | -1.210280 |
| H           | -1.486332 | -1.486326 | -0.952029 |
| H           | -2.846374 | -2.964590 | 0.323275  |
| H           | -0.795366 | -2.063322 | 1.405127  |
| H           | 0.689705  | 0.332585  | 1.621579  |
| Na          | 0.322297  | 0.391590  | -1.366046 |
| B           | 2.607510  | -0.373596 | -0.065108 |
| F           | 2.340026  | 0.886710  | -0.707914 |
| F           | 2.491844  | -0.196273 | 1.318354  |
| F           | 3.811326  | -0.878881 | -0.445240 |
| F           | 1.521959  | -1.211984 | -0.500422 |

| <b>INBb</b> |           |           |           |
|-------------|-----------|-----------|-----------|
| C           | -0.948593 | 2.333557  | -0.314511 |
| C           | -0.386239 | 1.215868  | -0.870910 |
| C           | -1.301520 | 0.130452  | -0.620493 |
| C           | -1.281766 | -1.251460 | -0.908167 |
| C           | -2.332418 | -2.039158 | -0.465089 |
| C           | -3.413811 | -1.481763 | 0.252187  |
| C           | -3.464269 | -0.128903 | 0.545874  |
| C           | -2.396935 | 0.666027  | 0.107121  |
| N           | -2.154335 | 2.010397  | 0.270335  |
| H           | -0.581419 | 3.349952  | -0.287658 |
| H           | 0.565704  | 1.167185  | -1.385423 |
| H           | -0.450583 | -1.678276 | -1.463690 |
| H           | -2.332376 | -3.103087 | -0.681280 |
| H           | -4.224130 | -2.126837 | 0.577757  |
| H           | -4.299025 | 0.297806  | 1.094843  |
| H           | -2.770393 | 2.664143  | 0.730336  |
| Na          | 0.494765  | -0.431769 | 1.146749  |
| B           | 2.914559  | -0.150833 | -0.015907 |
| F           | 2.898223  | 0.915086  | -0.893222 |
| F           | 2.500147  | 0.310452  | 1.291937  |
| F           | 4.111512  | -0.800220 | 0.060799  |
| F           | 1.857970  | -1.070625 | -0.389294 |

| <b>INCz</b> |           |           |           |
|-------------|-----------|-----------|-----------|
| C           | -0.543862 | 2.020237  | -0.596418 |
| C           | 0.596643  | 2.149248  | 0.158137  |
| C           | 1.288268  | 0.887285  | 0.083090  |
| C           | 2.473564  | 0.372760  | 0.647264  |
| C           | 2.801153  | -0.951938 | 0.417811  |
| C           | 1.971434  | -1.788442 | -0.363480 |
| C           | 0.809887  | -1.310557 | -0.946282 |
| C           | 0.494822  | 0.040365  | -0.735264 |
| N           | -0.597486 | 0.766144  | -1.156657 |
| H           | -1.337717 | 2.730350  | -0.782574 |
| H           | 0.923442  | 3.043453  | 0.670783  |
| H           | 3.112917  | 1.006026  | 1.256166  |
| H           | 3.710000  | -1.362073 | 0.847502  |
| H           | 2.250017  | -2.827746 | -0.507769 |
| H           | 0.160661  | -1.947816 | -1.538872 |
| H           | -1.468440 | 0.329391  | -1.458731 |
| Na          | -1.024733 | -0.078776 | 1.375468  |
| Cl          | -3.014580 | -0.822460 | 0.146518  |

| <b>INCb</b> |           |           |           |
|-------------|-----------|-----------|-----------|
| C           | -0.645547 | 2.411821  | -0.268005 |
| C           | 0.190088  | 1.440374  | -0.750357 |
| C           | -0.484415 | 0.182591  | -0.548455 |
| C           | -0.144159 | -1.160394 | -0.819499 |
| C           | -1.033956 | -2.156455 | -0.449543 |
| C           | -2.263878 | -1.846586 | 0.171822  |
| C           | -2.628275 | -0.537525 | 0.441722  |
| C           | -1.725922 | 0.469579  | 0.075078  |
| N           | -1.795939 | 1.835338  | 0.227943  |
| H           | -0.517332 | 3.484983  | -0.240981 |
| H           | 1.167746  | 1.581023  | -1.193489 |
| H           | 0.807633  | -1.392213 | -1.293044 |
| H           | -0.787768 | -3.194857 | -0.648958 |
| H           | -2.939174 | -2.652555 | 0.442695  |
| H           | -3.576589 | -0.303629 | 0.917363  |
| H           | -2.577187 | 2.340439  | 0.618787  |
| Na          | 1.386196  | -0.127817 | 1.239737  |
| Cl          | 3.421322  | -0.242647 | -0.055980 |

| <b>INFz</b> |           |           |           |
|-------------|-----------|-----------|-----------|
| C           | -0.714711 | 2.456137  | 0.057366  |
| C           | -1.806567 | 1.961189  | -0.607159 |
| C           | -1.880952 | 0.562331  | -0.292473 |
| C           | -2.730719 | -0.494045 | -0.670939 |
| C           | -2.479117 | -1.768604 | -0.190084 |
| C           | -1.398933 | -2.020119 | 0.685157  |
| C           | -0.552477 | -0.999231 | 1.096670  |
| C           | -0.801892 | 0.287646  | 0.589926  |
| N           | -0.115367 | 1.460318  | 0.790636  |
| H           | -0.307069 | 3.457550  | 0.067793  |
| H           | -2.476905 | 2.525238  | -1.240052 |
| H           | -3.568949 | -0.311005 | -1.337760 |
| H           | -3.125566 | -2.590911 | -0.481215 |
| H           | -1.239519 | -3.027080 | 1.059618  |
| H           | 0.272643  | -1.173734 | 1.782534  |
| H           | 0.826648  | 1.483298  | 1.177452  |
| Na          | 1.195770  | -0.708963 | -0.891336 |
| C           | 3.427448  | -0.022913 | 0.095832  |
| H           | 4.409847  | 0.274018  | 0.509850  |
| O           | 2.398489  | 0.277924  | 0.768576  |
| O           | 3.412823  | -0.632343 | -1.000295 |

| <b>INFb</b> |           |           |           |
|-------------|-----------|-----------|-----------|
| C           | -0.961803 | 2.408669  | -0.263390 |
| C           | -0.183884 | 1.456326  | -0.866193 |
| C           | -0.808014 | 0.185445  | -0.596561 |
| C           | -0.487011 | -1.147959 | -0.928265 |
| C           | -1.311724 | -2.161558 | -0.467244 |
| C           | -2.456455 | -1.878733 | 0.310322  |
| C           | -2.798424 | -0.579378 | 0.647330  |
| C           | -1.960871 | 0.445087  | 0.187282  |
| N           | -2.028703 | 1.807549  | 0.369343  |
| H           | -0.846234 | 3.483297  | -0.235988 |
| H           | 0.722410  | 1.615411  | -1.435903 |
| H           | 0.399684  | -1.357402 | -1.521848 |
| H           | -1.080078 | -3.193779 | -0.711517 |
| H           | -3.082432 | -2.698132 | 0.650592  |
| H           | -3.680399 | -0.364362 | 1.244051  |
| H           | -2.754776 | 2.294141  | 0.873480  |
| Na          | 1.340843  | -0.054909 | 0.910882  |
| C           | 3.610279  | -0.204113 | -0.127290 |
| H           | 4.619924  | -0.271798 | -0.578417 |
| O           | 2.625429  | -0.150228 | -0.913147 |
| O           | 3.537194  | -0.187139 | 1.129961  |

| <b>INNz</b> |           |           | <b>INNb</b> |    |           |           |           |
|-------------|-----------|-----------|-------------|----|-----------|-----------|-----------|
| C           | -1.252996 | 2.482275  | -0.097833   | C  | -1.060093 | 2.415049  | -0.352051 |
| C           | -2.054582 | 1.698766  | -0.883546   | C  | -0.373037 | 1.391054  | -0.946037 |
| C           | -1.962555 | 0.364081  | -0.359223   | C  | -1.100531 | 0.183479  | -0.652443 |
| C           | -2.465024 | -0.891222 | -0.758373   | C  | -0.895637 | -1.178125 | -0.961593 |
| C           | -2.084321 | -2.025718 | -0.054064   | C  | -1.791210 | -2.113451 | -0.467409 |
| C           | -1.217717 | -1.937134 | 1.060962    | C  | -2.897521 | -1.723328 | 0.320194  |
| C           | -0.717239 | -0.714291 | 1.486501    | C  | -3.128045 | -0.393810 | 0.634037  |
| C           | -1.095325 | 0.427264  | 0.765815    | C  | -2.217630 | 0.551432  | 0.141826  |
| N           | -0.700096 | 1.731312  | 0.911935    | N  | -2.167515 | 1.917099  | 0.301297  |
| H           | -1.027183 | 3.536580  | -0.175414   | H  | -0.850432 | 3.475489  | -0.340458 |
| H           | -2.641093 | 2.028648  | -1.729176   | H  | 0.539112  | 1.467026  | -1.522029 |
| H           | -3.135244 | -0.968813 | -1.610306   | H  | -0.041629 | -1.473991 | -1.565793 |
| H           | -2.462491 | -2.997846 | -0.355487   | H  | -1.647934 | -3.165185 | -0.695513 |
| H           | -0.936840 | -2.841782 | 1.591129    | H  | -3.582811 | -2.481597 | 0.686418  |
| H           | -0.029939 | -0.644174 | 2.324104    | H  | -3.981586 | -0.097877 | 1.237237  |
| H           | 0.130360  | 1.999888  | 1.425566    | H  | -2.842725 | 2.472604  | 0.805081  |
| Na          | 0.491829  | -0.830343 | -0.985575   | Na | 0.826636  | -0.310521 | 1.026423  |
| N           | 2.824249  | 0.022453  | -0.119733   | N  | 3.229715  | -0.159549 | 0.043713  |
| O           | 3.894695  | 0.373755  | 0.334642    | O  | 2.242109  | -0.497003 | -0.682219 |
| O           | 1.770403  | 0.715264  | 0.057467    | O  | 2.991558  | 0.067564  | 1.271056  |
| O           | 2.700128  | -1.048920 | -0.784101   | O  | 4.349062  | -0.055232 | -0.415064 |

| <b>ITBz</b> |           |           | <b>ITBb</b> |   |           |           |           |
|-------------|-----------|-----------|-------------|---|-----------|-----------|-----------|
| C           | -1.107975 | -1.444014 | 2.082395    | C | -2.048676 | -2.380196 | -1.294869 |
| C           | -2.310429 | -0.779601 | 2.084398    | C | -1.358121 | -2.197042 | -0.131035 |
| C           | -2.655967 | -0.551808 | 0.709359    | C | -1.872264 | -0.997843 | 0.468772  |
| C           | -3.719035 | 0.094065  | 0.047667    | C | -1.559516 | -0.282424 | 1.636895  |
| C           | -3.722809 | 0.135341  | -1.337128   | C | -2.232681 | 0.901980  | 1.898600  |
| C           | -2.690245 | -0.469610 | -2.090618   | C | -3.218556 | 1.394529  | 1.014513  |
| C           | -1.627884 | -1.108057 | -1.472408   | C | -3.554947 | 0.704438  | -0.141768 |
| C           | -1.616983 | -1.124452 | -0.070398   | C | -2.874903 | -0.492433 | -0.398981 |
| N           | -0.692127 | -1.653214 | 0.794105    | N | -2.963089 | -1.356843 | -1.464344 |
| H           | -0.502379 | -1.788394 | 2.909726    | H | -1.958738 | -3.158640 | -2.039531 |
| H           | -2.883518 | -0.501651 | 2.958223    | H | -0.551059 | -2.809191 | 0.244481  |
| H           | -4.529539 | 0.543604  | 0.616024    | H | -0.785102 | -0.651919 | 2.302619  |
| H           | -4.541920 | 0.623572  | -1.857379   | H | -2.009983 | 1.458708  | 2.805390  |
| H           | -2.735888 | -0.437562 | -3.175529   | H | -3.735630 | 2.320216  | 1.251713  |
| H           | -0.822192 | -1.570221 | -2.036073   | H | -4.318591 | 1.079113  | -0.818359 |
| H           | 0.214231  | -2.008029 | 0.500038    | H | -3.615297 | -1.280108 | -2.229530 |
| N           | 0.698082  | 2.259856  | 0.149352    | N | 1.132479  | 2.088101  | -0.498804 |
| C           | 0.437043  | 1.437227  | -1.077194   | C | 0.639271  | 3.465408  | -0.770613 |
| H           | -0.642406 | 1.399378  | -1.238503   | H | 0.505080  | 3.587371  | -1.847158 |
| H           | 0.945704  | 1.907267  | -1.921093   | H | -0.315060 | 3.603096  | -0.258295 |
| H           | 0.832643  | 0.433552  | -0.923134   | H | 1.372872  | 4.184556  | -0.401368 |
| C           | 2.173545  | 2.410001  | 0.360502    | C | 0.123457  | 1.095574  | -1.000291 |
| H           | 2.601053  | 2.897051  | -0.517697   | H | 0.043315  | 1.214136  | -2.083377 |
| H           | 2.327825  | 3.022691  | 1.251277    | H | 0.464772  | 0.088863  | -0.751402 |
| H           | 2.607618  | 1.417779  | 0.481295    | H | -0.830885 | 1.312955  | -0.516341 |
| C           | 0.096514  | 1.567762  | 1.335312    | C | 1.310537  | 1.908238  | 0.979615  |
| H           | 0.241613  | 2.201839  | 2.212925    | H | 1.678155  | 0.899020  | 1.168077  |
| H           | -0.966984 | 1.408156  | 1.144999    | H | 2.030838  | 2.651553  | 1.327792  |
| H           | 0.605156  | 0.610700  | 1.458608    | H | 0.338054  | 2.052664  | 1.453976  |
| C           | 0.072934  | 3.600137  | -0.018685   | C | 2.442332  | 1.873040  | -1.193637 |
| H           | 0.281413  | 4.201679  | 0.867921    | H | 3.162823  | 2.590280  | -0.795584 |
| H           | 0.497047  | 4.078116  | -0.903728   | H | 2.775698  | 0.852086  | -1.004476 |
| H           | -1.004130 | 3.471927  | -0.141581   | H | 2.290348  | 2.038894  | -2.262002 |
| B           | 2.659552  | -1.212761 | -0.293129   | B | 2.494651  | -1.430035 | 0.293807  |
| F           | 2.197009  | -0.707220 | 0.965209    | F | 2.996487  | -2.686302 | 0.531760  |
| F           | 1.520458  | -1.774464 | -0.931451   | F | 3.409822  | -0.414004 | 0.664612  |
| F           | 3.643827  | -2.148886 | -0.109855   | F | 1.298402  | -1.207140 | 1.029043  |
| F           | 3.101256  | -0.113439 | -1.051023   | F | 2.186823  | -1.243877 | -1.078396 |

|             |           |           |           |             |           |           |           |
|-------------|-----------|-----------|-----------|-------------|-----------|-----------|-----------|
| <b>ITCz</b> |           |           |           | <b>ITCb</b> |           |           |           |
| C           | 1.338379  | 1.513177  | 1.911725  | C           | 2.547018  | 1.648598  | -1.380396 |
| C           | 2.023305  | 0.330451  | 2.059311  | C           | 1.787715  | 1.815053  | -0.256998 |
| C           | 2.170240  | -0.223692 | 0.742565  | C           | 1.735881  | 0.536678  | 0.396391  |
| C           | 2.737519  | -1.401949 | 0.217291  | C           | 1.101865  | 0.070802  | 1.560657  |
| C           | 2.691376  | -1.617555 | -1.150735 | C           | 1.216201  | -1.271753 | 1.888863  |
| C           | 2.097519  | -0.674305 | -2.022044 | C           | 1.948531  | -2.166076 | 1.076557  |
| C           | 1.527110  | 0.490936  | -1.538323 | C           | 2.589733  | -1.731159 | -0.074615 |
| C           | 1.561117  | 0.695174  | -0.151774 | C           | 2.478375  | -0.372822 | -0.398159 |
| N           | 1.073694  | 1.743312  | 0.587164  | N           | 2.964587  | 0.332282  | -1.474942 |
| H           | 1.018094  | 2.225084  | 2.660722  | H           | 2.829261  | 2.362330  | -2.142082 |
| H           | 2.392946  | -0.080883 | 2.988691  | H           | 1.276170  | 2.712514  | 0.063327  |
| H           | 3.214706  | -2.124099 | 0.875286  | H           | 0.510410  | 0.759252  | 2.159070  |
| H           | 3.133143  | -2.518443 | -1.567348 | H           | 0.741896  | -1.647033 | 2.792339  |
| H           | 2.092768  | -0.868461 | -3.090950 | H           | 2.023830  | -3.210917 | 1.365507  |
| H           | 1.046732  | 1.216893  | -2.188866 | H           | 3.160743  | -2.417225 | -0.694965 |
| H           | 0.374327  | 2.392650  | 0.213941  | H           | 3.568722  | -0.037059 | -2.192589 |
| N           | -2.090761 | -1.109484 | 0.256035  | N           | -2.352608 | -0.780679 | -0.543170 |
| C           | -2.260563 | -2.503954 | 0.742188  | C           | -2.697007 | -2.107362 | -1.117371 |
| H           | -2.867994 | -2.493342 | 1.649154  | H           | -2.748724 | -2.020894 | -2.204485 |
| H           | -2.755600 | -3.092265 | -0.032887 | H           | -1.921969 | -2.823043 | -0.835829 |
| H           | -1.274793 | -2.921430 | 0.956338  | H           | -3.663459 | -2.427056 | -0.722398 |
| C           | -3.423986 | -0.500975 | -0.055159 | C           | -1.014504 | -0.336516 | -1.062403 |
| H           | -4.022923 | -0.499391 | 0.857898  | H           | -1.072885 | -0.295550 | -2.152740 |
| H           | -3.248351 | 0.520747  | -0.410727 | H           | -0.806513 | 0.651180  | -0.635916 |
| H           | -3.907874 | -1.107638 | -0.823573 | H           | -0.263681 | -1.063765 | -0.741776 |
| C           | -1.248779 | -1.107728 | -0.985992 | C           | -2.292663 | -0.878785 | 0.953234  |
| H           | -1.159706 | -0.069824 | -1.321492 | H           | -2.033639 | 0.115461  | 1.337539  |
| H           | -0.266132 | -1.518453 | -0.740020 | H           | -3.274264 | -1.198696 | 1.310413  |
| H           | -1.749421 | -1.724839 | -1.736015 | H           | -1.526005 | -1.611294 | 1.213255  |
| C           | -1.409844 | -0.285230 | 1.309393  | C           | -3.389179 | 0.232510  | -0.927133 |
| H           | -1.335016 | 0.735967  | 0.924114  | H           | -4.355161 | -0.105514 | -0.545718 |
| H           | -2.018872 | -0.322145 | 2.215615  | H           | -3.097162 | 1.189470  | -0.476755 |
| H           | -0.416762 | -0.702665 | 1.493074  | H           | -3.414112 | 0.298259  | -2.017036 |
| Cl          | -1.644127 | 2.366449  | -0.899766 | Cl          | -1.546418 | 2.427844  | 0.899757  |
| <b>ITFz</b> |           |           |           | <b>ITFb</b> |           |           |           |
| C           | 1.391363  | 1.089794  | 2.145319  | C           | 1.805570  | -0.800837 | 2.327685  |
| C           | 2.093509  | -0.091677 | 2.048119  | C           | 1.333435  | -1.599061 | 1.326462  |
| C           | 2.185788  | -0.393230 | 0.648806  | C           | 1.658478  | -0.947856 | 0.087447  |
| C           | 2.749423  | -1.437475 | -0.112604 | C           | 1.452745  | -1.282422 | -1.261986 |
| C           | 2.650870  | -1.390958 | -1.494180 | C           | 1.925594  | -0.422045 | -2.239787 |
| C           | 2.003382  | -0.315200 | -2.148030 | C           | 2.581968  | 0.781887  | -1.899832 |
| C           | 1.433517  | 0.722059  | -1.430024 | C           | 2.782166  | 1.146272  | -0.575969 |
| C           | 1.522900  | 0.665154  | -0.031535 | C           | 2.321362  | 0.261060  | 0.409543  |
| N           | 1.050272  | 1.546088  | 0.903412  | N           | 2.376715  | 0.342553  | 1.785937  |
| H           | 1.110016  | 1.652359  | 3.025762  | H           | 1.767964  | -0.930304 | 3.400622  |
| H           | 2.511174  | -0.656682 | 2.870432  | H           | 0.772869  | -2.517501 | 1.426162  |
| H           | 3.268320  | -2.258226 | 0.376868  | H           | 0.898154  | -2.182712 | -1.507100 |
| H           | 3.092900  | -2.184339 | -2.090786 | H           | 1.779889  | -0.665887 | -3.288160 |
| H           | 1.957515  | -0.304047 | -3.233448 | H           | 2.939690  | 1.436175  | -2.690062 |
| H           | 0.919139  | 1.547213  | -1.914547 | H           | 3.296435  | 2.068492  | -0.316750 |
| H           | 0.380254  | 2.312578  | 0.665837  | H           | 2.913968  | 1.019955  | 2.305542  |
| N           | -1.899663 | -1.476507 | 0.198053  | N           | -1.675636 | 1.481785  | 0.122801  |
| C           | -1.362625 | -0.558882 | 1.258573  | C           | -1.125817 | 2.851266  | 0.293973  |
| H           | -0.338046 | -0.858432 | 1.491565  | H           | -1.523359 | 3.279829  | 1.216438  |
| H           | -1.386206 | 0.454871  | 0.848879  | H           | -0.036622 | 2.785219  | 0.346173  |
| H           | -2.000741 | -0.653462 | 2.140600  | H           | -1.422574 | 3.461423  | -0.561526 |
| C           | -3.297259 | -1.066446 | -0.144706 | C           | -1.265065 | 0.624444  | 1.283853  |
| H           | -3.257675 | -0.036212 | -0.510710 | H           | -1.751091 | 1.015238  | 2.181109  |
| H           | -3.676390 | -1.744970 | -0.912047 | H           | -1.564808 | -0.404676 | 1.065943  |
| H           | -3.908936 | -1.141666 | 0.757074  | H           | -0.179326 | 0.683342  | 1.378573  |
| C           | -1.041072 | -1.362776 | -1.027748 | C           | -1.126843 | 0.875521  | -1.135986 |
| H           | -0.018984 | -1.646309 | -0.763763 | H           | -1.432144 | -0.174234 | -1.163759 |
| H           | -1.443770 | -2.039387 | -1.785552 | H           | -1.520208 | 1.442014  | -1.983419 |
| H           | -1.077976 | -0.321972 | -1.356487 | H           | -0.038659 | 0.949109  | -1.098320 |
| C           | -1.879698 | -2.877668 | 0.693848  | C           | -3.170344 | 1.533216  | 0.043836  |
| H           | -2.271423 | -3.536724 | -0.083584 | H           | -3.444191 | 2.159634  | -0.808108 |
| H           | -0.848735 | -3.147990 | 0.929840  | H           | -3.523552 | 0.503392  | -0.083175 |
| H           | -2.499608 | -2.945470 | 1.590058  | H           | -3.545373 | 1.975258  | 0.969828  |
| C           | -1.740452 | 2.787083  | -0.686707 | C           | -2.481040 | -2.353799 | -0.306565 |
| H           | -2.426940 | 3.491915  | -1.205055 | H           | -2.875797 | -3.387667 | -0.439960 |
| O           | -0.837862 | 3.305112  | 0.008401  | O           | -1.235758 | -2.229095 | -0.220156 |
| O           | -1.961641 | 1.558790  | -0.866648 | O           | -3.335752 | -1.432449 | -0.258251 |

| <b>ITNz</b> |           |           | <b>ITNb</b> |   |           |           |           |
|-------------|-----------|-----------|-------------|---|-----------|-----------|-----------|
| C           | -1.394131 | -1.348231 | 2.225294    | C | -2.177389 | 0.054206  | -2.348966 |
| C           | -2.408505 | -0.450620 | 1.994011    | C | -1.540984 | -1.004870 | -1.769910 |
| C           | -2.512599 | -0.307492 | 0.568218    | C | -1.676922 | -0.845993 | -0.346331 |
| C           | -3.321903 | 0.456296  | -0.297617   | C | -1.246235 | -1.602306 | 0.758092  |
| C           | -3.145425 | 0.330288  | -1.666016   | C | -1.584960 | -1.168276 | 2.030799  |
| C           | -2.176779 | -0.550707 | -2.202657   | C | -2.330530 | 0.013595  | 2.228774  |
| C           | -1.356218 | -1.303893 | -1.380686   | C | -2.745901 | 0.794285  | 1.157941  |
| C           | -1.532701 | -1.164380 | 0.003009    | C | -2.411878 | 0.346199  | -0.127589 |
| N           | -0.873640 | -1.784526 | 1.034529    | N | -2.678051 | 0.896139  | -1.365897 |
| H           | -1.001112 | -1.720951 | 3.161504    | H | -2.309419 | 0.302645  | -3.393133 |
| H           | -3.019343 | 0.027665  | 2.747277    | H | -1.000993 | -1.794906 | -2.271640 |
| H           | -4.083925 | 1.120325  | 0.103088    | H | -0.631687 | -2.485873 | 0.609712  |
| H           | -3.771410 | 0.905343  | -2.342513   | H | -1.259555 | -1.742500 | 2.893119  |
| H           | -2.073578 | -0.632913 | -3.280901   | H | -2.584283 | 0.321484  | 3.239445  |
| H           | -0.586778 | -1.961613 | -1.773502   | H | -3.324064 | 1.702254  | 1.311965  |
| H           | 0.014228  | -2.264906 | 0.900991    | H | -3.313250 | 1.661617  | -1.534388 |
| N           | 0.966739  | 2.082648  | 0.166011    | N | 1.510981  | 1.755043  | 0.114931  |
| C           | 0.850495  | 1.099745  | 1.292737    | C | 0.891694  | 3.096559  | 0.291393  |
| H           | -0.195307 | 0.796295  | 1.374938    | H | 1.157400  | 3.724335  | -0.561213 |
| H           | 1.475190  | 0.238378  | 1.050166    | H | -0.192130 | 2.971504  | 0.345871  |
| H           | 1.177196  | 1.595075  | 2.210041    | H | 1.264801  | 3.541208  | 1.215914  |
| C           | 0.054030  | 3.231392  | 0.414509    | C | 1.022867  | 1.160881  | -1.176192 |
| H           | 0.346745  | 3.722294  | 1.344902    | H | 1.365373  | 1.806202  | -1.988774 |
| H           | 0.130938  | 3.931581  | -0.419802   | H | 1.429429  | 0.152462  | -1.287287 |
| H           | -0.967058 | 2.851396  | 0.492392    | H | -0.067185 | 1.133682  | -1.144843 |
| C           | 2.381045  | 2.559296  | 0.066428    | C | 1.108032  | 0.880734  | 1.267614  |
| H           | 3.011813  | 1.689626  | -0.127085   | H | 1.602150  | -0.087793 | 1.176144  |
| H           | 2.444967  | 3.281407  | -0.750078   | H | 1.420842  | 1.377936  | 2.189008  |
| H           | 2.651074  | 3.036438  | 1.010838    | H | 0.023354  | 0.765979  | 1.247620  |
| C           | 0.574572  | 1.402857  | -1.113209   | C | 3.001603  | 1.878915  | 0.080137  |
| H           | -0.488182 | 1.161541  | -1.056898   | H | 3.332314  | 2.311061  | 1.026992  |
| H           | 0.766005  | 2.094953  | -1.936480   | H | 3.414629  | 0.877907  | -0.058575 |
| H           | 1.168268  | 0.489715  | -1.204010   | H | 3.273474  | 2.535510  | -0.748960 |
| N           | 2.799302  | -1.505703 | -0.302521   | N | 2.024398  | -1.930345 | -0.187018 |
| O           | 3.516941  | -2.494702 | -0.253278   | O | 2.993142  | -1.132717 | -0.331337 |
| O           | 1.537286  | -1.612030 | -0.241526   | O | 1.816905  | -2.451268 | 0.920353  |
| O           | 3.281045  | -0.347754 | -0.407087   | O | 1.257593  | -2.134032 | -1.148474 |
